# Supplementary material for: Identifying Long-Term Effects of SARS-CoV-2 and Their Association with Social Determinants of Health in a Cohort of Over One Million COVID-19 Survivors
Source: Research Square preprint supplement (doi:10.21203/rs.3.rs-1032897/v1), 2021-11-11
Supplement: Supplementary file 1 [file 261bac57d90f24e0759d6968.docx]

Supplementary Figures/Tables: Identifying long-term effects of SARS-CoV-2 and their association with social determinants of health in a cohort of over one million COVID-19 survivors

Authors: Sumit Mukherjee1* (BS, MS, PHD), Meghana Kshirsagar1* (BS, MS, PHD), Nicholas Becker1,2 (BS, MS), Yixi Xu1 (BS, PHD), William B Weeks3 (BS, MD, MBA, PHD), Shwetak Patel2 (BS, PHD), Juan Lavista Ferres1 (BS, MS), Michael L. Jackson4 (BA, MPH, PHD).

*Equal contributing authors in random order of names

1AI for Good Research Lab, Microsoft Corporation, Redmond, USA.

2University of Washington, Seattle, USA.

3Microsoft Corporation, Paris, France.

4Kaiser Permanente Washington, Seattle, USA.

Corresponding author: Dr. Meghana Kshirsagar, email: [Meghana.Kshirsagar@microsoft.com](mailto:Meghana.Kshirsagar@microsoft.com), postal address: 1 Microsoft Way, Redmond, WA 98052, phone: +1 (425) 4218258.

## Contents

Supplementary Figure 1: Study design showing the time periods for defining the co-morbidities, the outcome and control periods with respect to the COVID-19 onset date. A) Study design for identification of long-term effects and their association with SDOH variables. B) Study design for identification of long-term effects in different one-month windows post-diagnosis.

Supplementary Table 1: 4 digit ICD10 codes (in the D84.* and G93.* range) that were observed in a significantly higher proportion in the post-covid window compared to the control window.

Supplementary Table 2: Co-occurring patterns whose presence was significantly higher in the post-COVID period compared to the control period. Reported statistics and p-values computed on the non-SDOH cohort.

Supplementary Figure 2: Association analysis of comorbidity and past conditions with ICD10 codes corresponding to long term effects of COVID-19. Green indicates no association, blue indicates a negative association, yellow indicates a positive association.


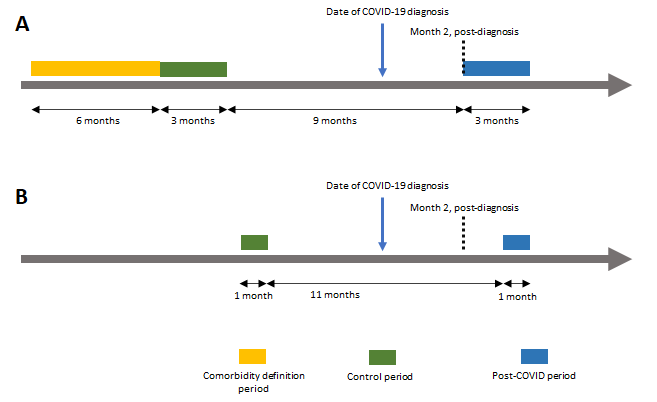


**Supplementary Figure 1: Study design showing the time periods for defining the co-morbidities, the outcome and control periods with respect to the COVID-19 onset date. A) Study design for identification of long-term effects and their association with SDOH variables. B) Study design for identification of long-term effects in different one-month windows post-diagnosis.**

| ICD10 | Condition | Control% | Post% | p-value |
| --- | --- | --- | --- | --- |
| D84.9 | Immunodeficiency | 0.029 | 0.047 | 3.11E-09 |
| G93.1 | Anoxic brain damage | 0.033 | 0.050 | 6.20E-08 |
| G93.3 | Postviral fatigue syndrome | 0.015 | 0.066 | 1.92E-55 |
| G93.4 | Unspecified encephalopathy | 0.492 | 0.605 | 9.03E-22 |
| G93.6 | Cerebral edema | 0.020 | 0.028 | 2.79E-04 |

**Supplementary Table 1: 4 digit ICD10 codes (in the D84.* and G93.* range) that were observed in a significantly higher proportion in the post-covid window compared to the control window.**

| ICD10 | Control% | Post% | p-value |
| --- | --- | --- | --- |
| D64, I10 | 1.126794 | 1.15878 | 3.1E-02 |

**Supplementary Table 2: Co-occurring patterns whose presence was significantly higher in the post-COVID period compared to the control period. Reported statistics and p-values computed on the non-SDOH cohort.**


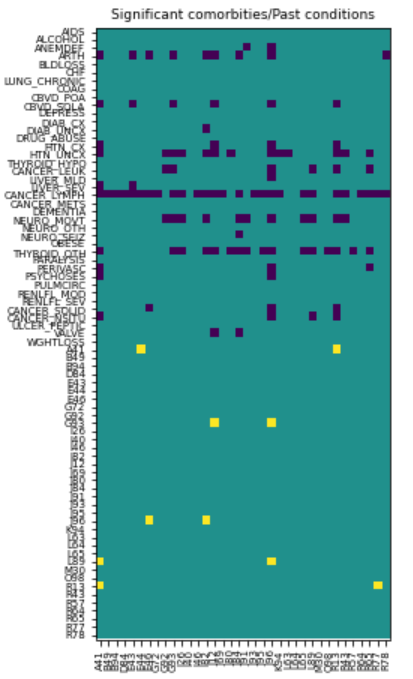


**eFigure 2: Association analysis of comorbidity and past conditions with ICD10 codes corresponding to long term effects of COVID-19. Green indicates no association, blue indicates a negative association, yellow indicates a positive association.**
